# Supplementary material for: Neuronal activation of Gαq EGL-30/GNAQ late in life rejuvenates cognition across species
Source: PubMed Central journal article supplement — Cell Rep. Author manuscript; Available in PMC 2023 Nov 6. (PMC10627507; doi:10.1016/j.celrep.2023.113151), 2023-09-19
Supplement: NIHMS1937436-supplement-Supplementary_Material.pdf [file NIHMS1937436-supplement-Supplementary_Material.pdf]

Cell Reports, Volume 42

## Supplemental information

### Neuronal activation of $G_{\alpha q}$ EGL-30/GNAQ

### late in life rejuvenates cognition across species

Morgan E. Stevenson, Gregor Bieri, Rachel Kaletsky, Jonathan St. Ange, L. Remesal, Karishma J.B. Pratt, Shiyi Zhou, Yifei Weng, Coleen T. Murphy, and Saul A. Villeda

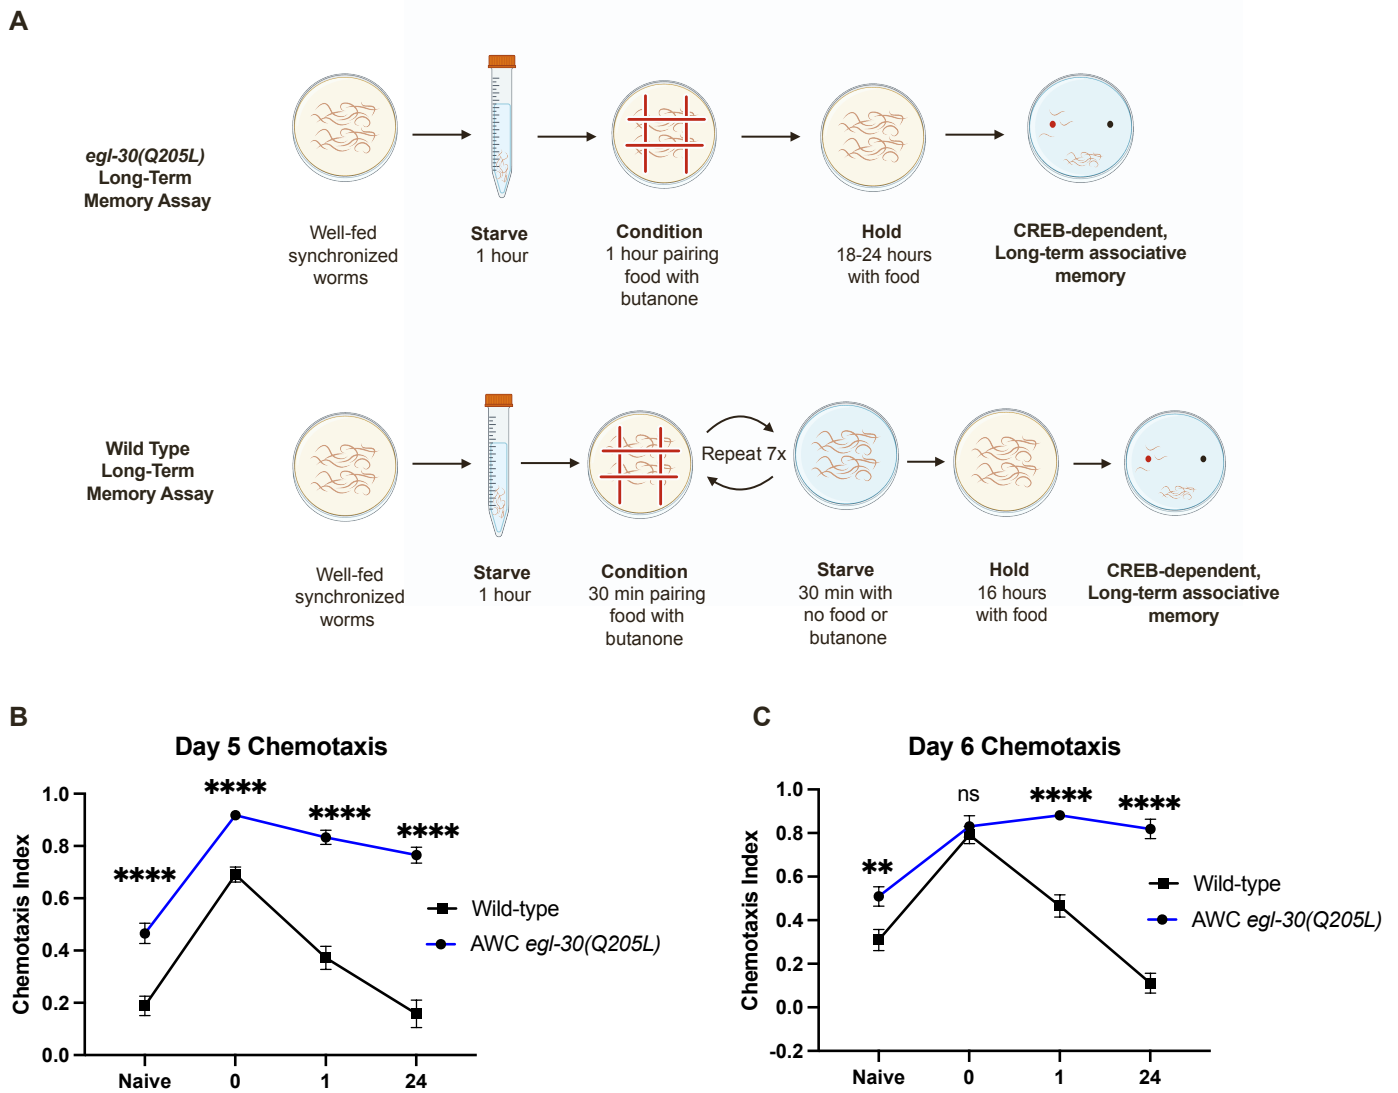

**Fig. S1.** Memory assay and chemotaxis for heat-shock inducible AWC-*egl-30(Q205L)* strain with age. **(A)** Schematic of memory assays. *egl-30(Q205L)* can form CREB-dependent long-term memories with a single training pairing butanone with food. However, wild-type worms require seven pairings to form a CREB-dependent long-term memory. **(B)** Day 5 and **(C)** Day 6, 1-hour short-term and 24-hour long-term memory was extended in *C. elegans* after AWC-only *egl-30(Q205L)* activation late-in-life. Data presented as Mean  $\pm$  SEM. Two-way ANOVA with Bonferroni *post hoc* test \*\* $p < 0.01$ ; \*\*\*\* $p < 0.0001$

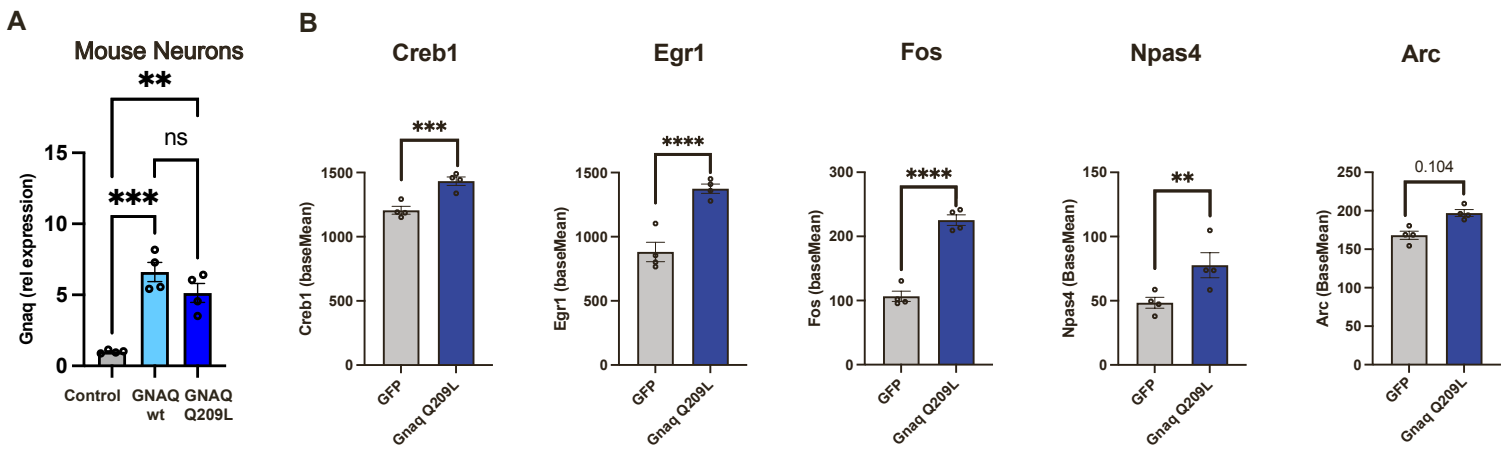

**Fig. S2.** Relative Expression of Gnaq in mouse primary neurons and IEG expression. (A) Gnaq expression for GNAQ wt and GNAQ(Q209L) were elevated compared to control, but they did not differ from each other. (B) Gnaq(Q209L) overexpression increases immediate early gene expression in primary neurons. mRNA expression was assessed using RNA-sequencing of primary neurons infected with Gnaq Q209L or GFP control. Data presented as Mean  $\pm$  SEM and Bonferroni correction was applied for bulk sequencing analyses \*\* $p < 0.01$ ; \*\*\*\* $p < 0.0001$ .

A

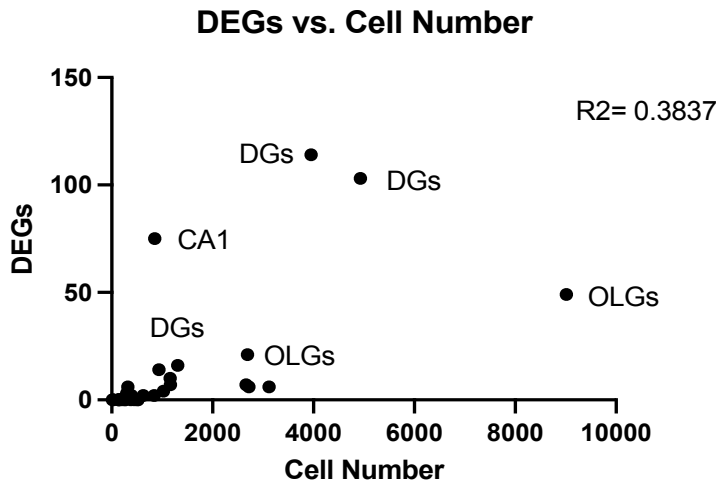

**Fig. S3.** Differentially expressed genes (DEGs) vs. cell number per cluster. (A) There is not a strong correlation between the number of differentially expressed genes and the number of cells per cluster. Pearson Correlation; R squared=0.3827
